# Supplementary material
Source: Springer Nature journal article supplement (https://www.springerprofessional.de/resource/supplementary/13638_2013_1054_MOESM2_ESM.pdf/11898864)
Supplement: MOESM2 [file 11898864]

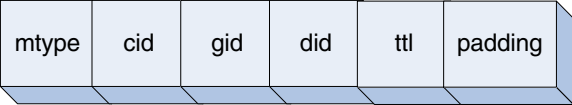

mtype: message type (IAYK)

cid: sequence number of route-update cycle

gid: identifier of the node generating the message

did: identifier of the node receiving the message

ttl: Time to Live

padding: is variable in message size
